# Supplementary material
Source: PubMed Central journal article supplement (PMC535801)

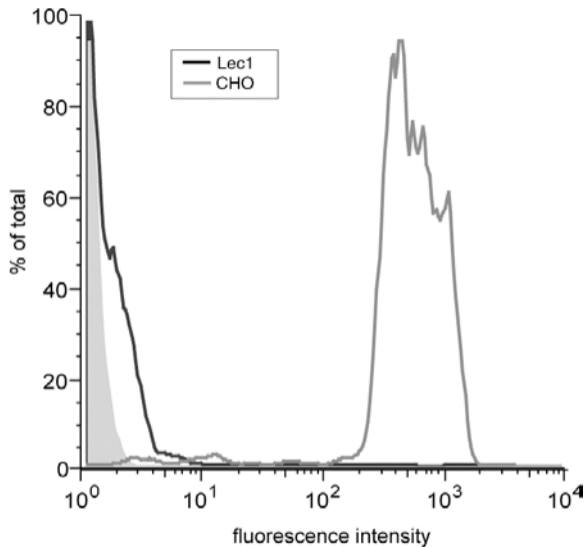

Supplement: pnas_101_52_18153__1.pdf [file pnas_101_52_18153__1.pdf]

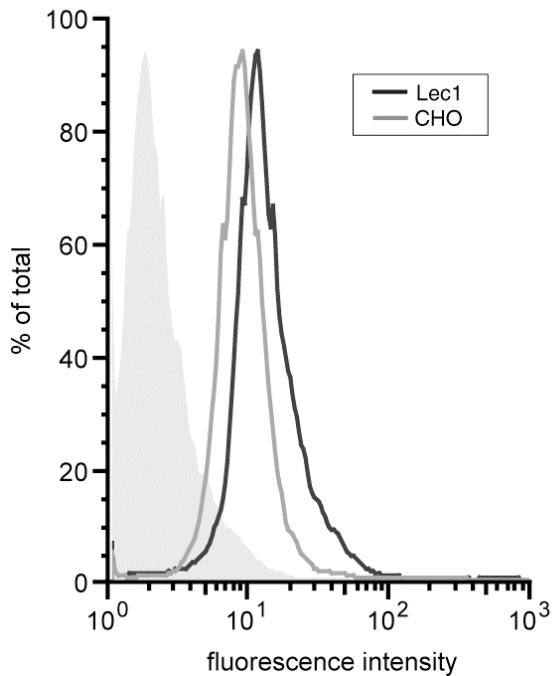

Supplement: pnas_101_52_18153__2.pdf [file pnas_101_52_18153__2.pdf]

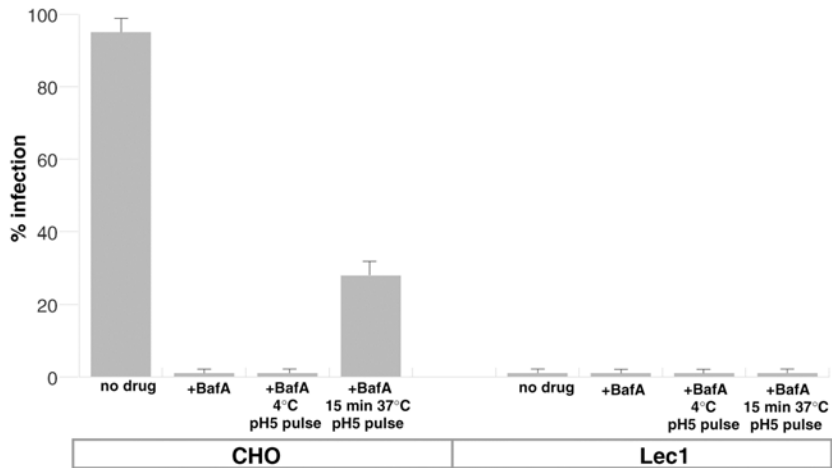

Supplement: pnas_101_52_18153__3.pdf [file pnas_101_52_18153__3.pdf]

**CHO**

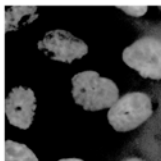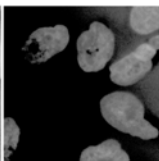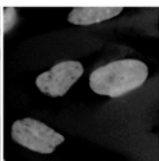

**Hoechst**

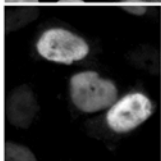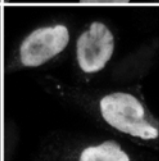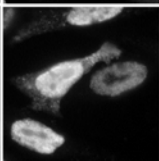

**influenza  
NP**

**Lec1**

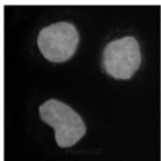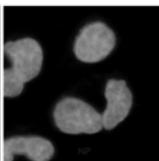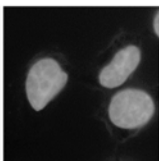

**Hoechst**

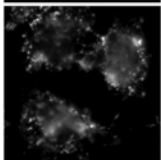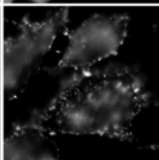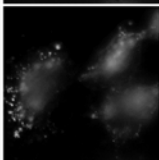

**influenza  
NP**

**A/WSN**

**A/Udorn**

**B/Yamagata**

Supplement: pnas_101_52_18153__4.pdf [file pnas_101_52_18153__4.pdf]

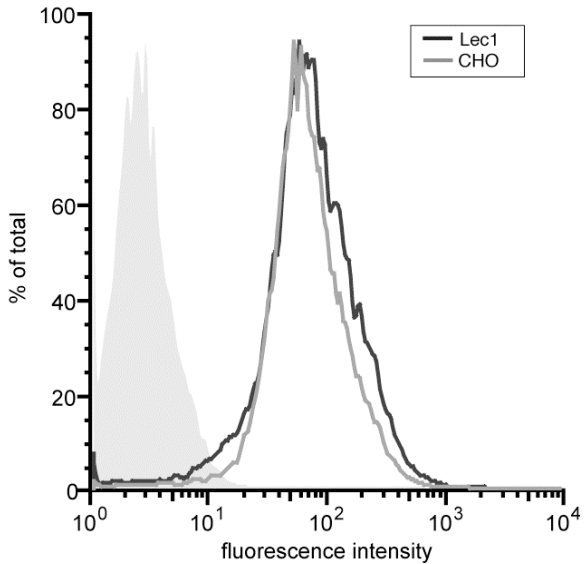

Supplement: pnas_101_52_18153__5.pdf [file pnas_101_52_18153__5.pdf]

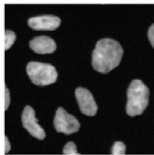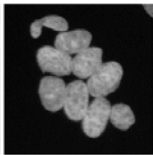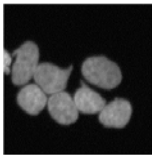

**Hoechst**

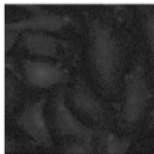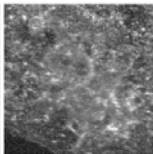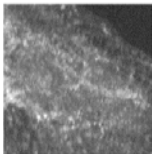

**VSV-G**

Supplement: pnas_101_52_18153__6.pdf [file pnas_101_52_18153__6.pdf]
